# Supplementary material for: A rapid on-site analysis method for the simultaneous extraction and determination of Pb2+ and Cd2+ in cereals
Source: Royal Society of Chemistry journal article supplement (doi:10.1039/c9ra05587h), 2019-01-01
Supplement: c9ra05587h1.pdf [file c9ra05587h1.pdf]

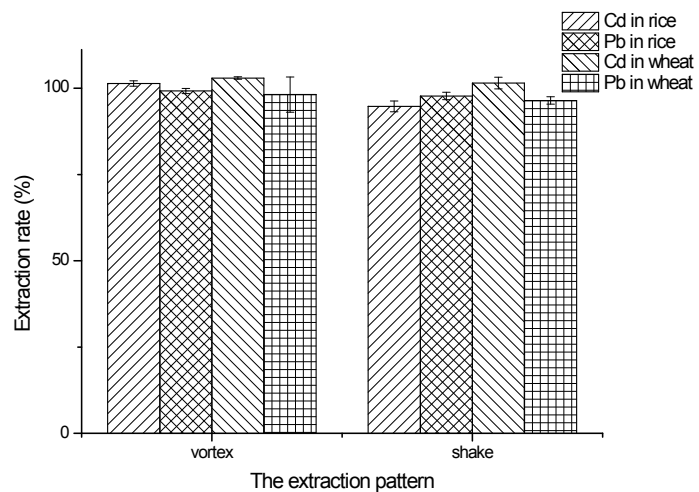

Fig.1 The effect of the extraction pattern

Table 1 Significant analysis of slopes of curves

|       | Cd <sup>2+</sup> |             | Pb <sup>2+</sup> |             |
|-------|------------------|-------------|------------------|-------------|
| Rice  | <i>P</i> =0.358* | <i>P</i> =0 | <i>P</i> =0.623* | <i>P</i> =0 |
| Wheat |                  |             |                  |             |
| Water |                  |             |                  |             |

Note: \**P*>0.05, no significant difference
